# Supplementary material
Source: PubMed Central journal article supplement (PMC9857016)
Supplement: jama-e2222385-s004.pdf [file jama-e2222385-s004.pdf]

## Data Sharing Statement

### Data

**Data available:** Yes

**Data types:** Deidentified participant data

**How to access data:** The data that support the findings of this study are available from the corresponding author, upon reasonable request. A request can be send to:

[l.r.vdvaart@gmail.com](mailto:l.r.vdvaart@gmail.com)

**When available:** With publication

### Supporting Documents

**Document types:** None

### Additional Information

**Who can access the data:** The data will be made available to whom have a reasonable request.

**Types of analyses:** Based on the request. Any request will be evaluated in the research group and then will be decided if the data can be used for the requested analyses.

**Mechanisms of data availability:** With a signed data access agreement
